# Supplementary material for: OTUD4 suppresses colorectal cancer progression through deubiquitinating p53
Source: Research Square preprint supplement (doi:10.21203/rs.3.rs-7187190/v1), 2025-08-29
Supplement: Supplementary file 1 [file 240a857d5531564174c1d5da.docx]

**Supplementary Table 1. Antibodies used in immunoreaction-based assays**

| **Protein** | **Company** | **Catalogue**  **number** | **Application** |
| --- | --- | --- | --- |
| **Primary antibody** | |  |  |
| OTUD4 | Proteintech | 25070-1-AP | WB 1:1000 |
| P53 | Abcam | ab236639 | IHC 1:400  IP 1:100 |
| GAPDH | Abclonal | AC001 | WB 1:10000 |
| p21  (for human) | Abcam | ab109520 | WB 1:1000 |
| p21  (for mouse) | Abcam | ab188224 | WB 1:1000  IHC 1:200 |
| Flag-tag | Cell Signaling | 14793 | WB 1:1000 |
| HA-tag | Abcam | ab9110 | WB 1:5000  IP 1:100 |
| His-tag | Cell Signaling | 2365 | WB 1:1000 |
| Cleaved  capase-3 | Cell Signaling | 9664 | WB 1:1000  IHC 1:200 |
| Ki-67 | Proteintech | 27309-1-AP | IIHC 1: 5000 |
| **Secondary antibody** | |  |  |
| Anti-Rabbit | Abclonal | AS014 | WB 1:5000 |
| Anti-Mouse | Abclonal | AS003 | WB 1:5000 |

WB, western blot; IHC, immunohistochemistry; IP, immunoprecipitation;
