# Supplementary material for: OTUD4 suppresses colorectal cancer progression through deubiquitinating p53
Source: Research Square preprint supplement (doi:10.21203/rs.3.rs-7187190/v1), 2025-08-29
Supplement: Supplementary file 2 [file 395410125ea822be1f67f693.docx]

**Supplementary Table 3. Sequences of primers for RT‒qPCR assays**

| **Gene** | **Forward primer** | **Reverse primer** |
| --- | --- | --- |
| *OTUD4* | AGGCCGCGTCTTTCTTTTTG | CCCCCACAAGTTTCCTCCTC |
| *Otud4* | TCAGCCTGACAGGAGTAGGT | AGAATCCCAAGCAGACTCGAC |
| *TP53* | ACCTATGGAAACTACTTCCTGAAA | ACCATCGCTATCTGAGCAGC |
| *Trp53* | CATCCTGGCTGTAGGTAGCG | TGGCAGTCATCCAGTCTTCG |
| *CDKN1A* | AAGTCAGTTCCTTGTGGAGCC | AACCTCCGGGAGAGAGGAAA |
| *Cdkn1a* | TAAGGACGTCCCACTTTGCC | CTGAGGATCACCCCCAGGTA |
| *GAPDH* | ACAACTTTGGTATCGTGGAAGG | GCCATCACGCCACAGTTTC |
| *Gapdh* | ATTGTCAGCAATGCATCCTG | ATGGACTGTGGTCATGAGCC |
