# Supplementary material for: OTUD4 suppresses colorectal cancer progression through deubiquitinating p53
Source: Research Square preprint supplement (doi:10.21203/rs.3.rs-7187190/v1), 2025-08-29
Supplement: Supplementary file 3 [file 60d6d1f04d97fb0eadb751ce.docx]

**Supplementary Table 2. Sequences of shRNAs**

| **shRNA** | **Sequence** |
| --- | --- |
| shOTUD4#1 | CAAATTTGCCTAACCAGAATG |
| shOTUD4#2 | GAGTTTCACCTTGACCATAAC |
| shp53 (human) | CCAGTCGTTAACAAGTGGAAT |
| shControl | TTCTCCGAACGTGTCACGT |
